# Supplementary material for: Interactions of Tomato Chlorosis Virus p27 Protein with Tomato Catalase Are Involved in Viral Infection
Source: MDPI journal article supplement (doi:10.3390/v15040990), 2023-04-18
Supplement: s1 [file s1]

**Table S1 Primers used in this study**

| Primer                | Primer sequence                                                                                                | Purpose            |
|-----------------------|----------------------------------------------------------------------------------------------------------------|--------------------|
| PVX-Flag-p27-F        | CACCAGCTAGCATCGATATGGATTACAAGGATGACGACGATA                                                                     | Overexpression     |
| PVX-Flag-p27-R        | AGGAGGTTCGTGTACAATTCAGACG<br>TTCATCGGCGGTTCGACTCACTTATCGTCGTCATCCTTGTAATC<br>AATATAATAATTTGAGACTCTT            |                    |
| PVX-1457-F            | TCACGCAGCAAAAGAAAGGC                                                                                           |                    |
| PVX-4667-R            | CTCACCTTGTCAGGGACACC                                                                                           | RT-PCR detection   |
| ToCV p27X-R5          | TCAAATATAATAATTTGAGACTCTTCTATATTG                                                                              | p27 point mutation |
| ToCV p27X-F6          | TTTTCAATATGATTTCACCTATTTTACC                                                                                   |                    |
| TB1520-1-F            | CGGTTGGGAATTCATTTACCATGGGACGCGATTGGAA                                                                          | p27 point mutation |
| TB1520-1-R            | CGTCTCAATTCTACACGACCTCCATCGATCA                                                                                |                    |
| TB1520-2-F            | GGTCGTGTACAATTGAGACGATGTTAACAGTGGAGTT                                                                          | p27 point mutation |
| TB1520-2-R            | GTCATTATCTTATCTTTTCGCGAAGAACTTAATGACAGTGAA<br>GACG                                                             |                    |
| HBJC-CE+p27-F         | ATGGAGAACAGTGCTGTTGC                                                                                           | p27 point mutation |
| HBJC-CE+p27-R         | TCAAATATAATAATTTGAGA                                                                                           |                    |
| ToCV p27X-F1          | TGGGAATTCATTTACCATGGGACGCGATTGGAAAGTATGGA                                                                      | p27 point mutation |
| ToCV p27X-R1          | AACCGGATCAAATCCACTGTTAACATCGTCT                                                                                |                    |
| ToCV p27X-F2          | CAGTGGAGTTTGATCCGGTTAAGATGTAAATACGACCG                                                                         | p27 point mutation |
| ToCV p27X-R2          | CATTATCTTATCTTTTCGCGAAGAACTTAATGACAGTGAAGA<br>CGA                                                              |                    |
| ToCV p27X-CE-GFP-F3   | TCTCAAATTATTATATTTGAATGGAGAACAGTGCTGTTGCAA                                                                     | p27 point mutation |
| ToCV p27X-CE-GFP-R3   | CCCTTGCTCACCATTCGATTAGGATTAGCCGGAATG                                                                           |                    |
| ToCV p27X-CE-GFP-F4   | AATCGAATGGTGAGCAAGGGCGAGG                                                                                      | p27 point mutation |
| ToCV p27X-CE-GFP-R4   | AGTGGAAATCATATTGAAAATTACTTGACAGCTCGTCCATG<br>CC                                                                |                    |
| ToCV p27X-CE-p27-F3   | TCTCAAATTATTATATTTGAATGGAGAACAGTGCTGTTGCAA                                                                     | p27 point mutation |
| ToCV p27X-CE-p27-R3-1 | CGACCTCCATTCGATTAGGATTAGCCGGAATG                                                                               |                    |
| ToCV p27X-CE-p27-F4-1 | TCCTAATCGAATGGAGGTCGTGTACAATTCAGACG                                                                            | p27 point mutation |
| ToCV p27X-CE-p27-R4-1 | AGTGGAAATCATATTGAAAATCAAATATAATAATTTGAGACTC<br>TTTCTATATTG<br>GCAACAGCACTGTCTCCATTCAAATATAATAATTTGAGACTC<br>TT |                    |
| 1577-R                | CTCAAATTATTATATTTGATTTTCAATATGATTTCACCTATTTT<br>ACC                                                            | p27 point mutation |
| 108-F                 |                                                                                                                |                    |
| BD-p27-F              | TCAGAGGAGGACCTGCATATGATGGAGGTCGTGTACAATTC                                                                      | Y2H                |
| BD-p27-R              | CTAGTTATGCGGCCGCTGCAGTCAAATATAATAATTTGAGA                                                                      |                    |
| AD-SICAT1-F           | GAGGCCAGTGAATTCATGGATCCCTCTAAGTATCG                                                                            | Y2H                |
| AD-SICAT1-R           | GAGCTCGATGGATCCTCACATTGTAGGCTTCACAG                                                                            |                    |
| AD-SICAT2-F           | GAGGCCAGTGAATTCATGGATCCTTACAAGTACCGTC                                                                          | Y2H                |
| AD-SICAT2-R           | GAGCTCGATGGATCCTCATATGCTTGGTCTCACATTA                                                                          |                    |

|                        |                                                |                                    |
|------------------------|------------------------------------------------|------------------------------------|
| AD-SICAT1(1-1284)-F    | gtaccagattacgctcatatgATGGATCCATACAAGTATCG      | Y2H                                |
| AD-SICAT1(1-1284)-R    | atgccacccgggtggaattcAAAATTGTTCTCTTTCTGAATGAC   |                                    |
| AD-SICAT1(1228-1476)-F | gtaccagattacgctcatatgTCACAATGTGCACTGGAAAACG    | Y2H                                |
| AD-SICAT1(1228-1476)-R | atgccacccgggtggaattcTATGCTTGGTCTCACATTAAGCCTAG |                                    |
| AD-SICAT1(1-594)-F     | gtaccagattacgctcatatgATGGATCCATACAAGTATCG      | Y2H                                |
| AD-SICAT1(1-594)-R     | atgccacccgggtggaattcATCTTGGGGAATACCAATATC      |                                    |
| AD-SICAT1(568-1476)-F  | gtaccagattacgctcatatgTTCGACGATATTGGTATTC       | Y2H                                |
| AD-SICAT1(568-1476)-R  | atgccacccgggtggaattcTATGCTTGGTCTCACATTAAGCCTAG |                                    |
| AD-SICAT1(1-441)-F     | gtaccagattacgctcatatgATGGATCCATACAAGTATCG      | Y2H                                |
| AD-SICAT1(1-441)-R     | atgccacccgggtggaattcATCACGGATGAAGAAGACGG       |                                    |
| AD-SICAT1(382-1476)-F  | gtaccagattacgctcatatgATCACGGATGAAGAAGACGG      | Y2H                                |
| AD-SICAT1(382-1476)-R  | atgccacccgggtggaattcTATGCTTGGTCTCACATTAAGCCTAG |                                    |
| AD-SICAT1(1-240)-F     | gtaccagattacgctcatatgATGGATCCATACAAGTATCG      | Y2H                                |
| AD-SICAT1(1-240)-R     | atgccacccgggtggaattcGTCATGGGTAACCTCAAAGA       |                                    |
| AD-SICAT1(157-441)-F   | gtaccagattacgctcatatgAATTTTGACAGGGAACGTGT      | Y2H                                |
| AD-SICAT1(157-441)-R   | atgccacccgggtggaattcATCACGGATGAAGAAGACGG       |                                    |
| AD-SICAT1(1-231)-F     | gtaccagattacgctcatatgATGGATCCATACAAGTATCG      | Y2H                                |
| AD-SICAT1(1-231)-R     | atgccacccgggtggaattcAACTTCAAAGAACCCTTTGGC      |                                    |
| AD-SICAT1(1-216)-F     | gtaccagattacgctcatatgATGGATCCATACAAGTATCG      | Y2H                                |
| AD-SICAT1(1-216)-R     | atgccacccgggtggaattcTTGGCACTAGCACCTCGGGC       |                                    |
| YFP-C-SICAT2-F         | GAGAACACGGGGGACTCTAGAATGGATCCTTACAAGTACCGTC    | BiFC                               |
| YFP-C-SICAT2-R         | GACAGTACTATCGATGGATCCTATGCTTGGTCTCACATTAAGC    | BiFC                               |
| YFP-C-SICAT1-F         | GAGAACACGGGGGACTCTAGAATGGATCCCTCTAAGTATCGC     | BiFC                               |
| YFP-C-SICAT1-R         | GACAGTACTATCGATGGATCCCATTTGTAGGCTTCACAGTGAG    | BiFC                               |
| YFP-N-p27-F            | AGAACACGGGGGGACTCTAGAATGGAGGTCGTGTACAATTC      | BiFC                               |
| YFP-N-p27-R            | GACAGTACTATCGATGGATCCAATATAATAATTTGAGACTCTT    | BiFC                               |
| 2-PROKII-p27-F         | ACGGGGGACTCTAGAGGATCCATGGAGGTCGTGTACAATTC      | subcellular localization,<br>Co-IP |
| 2-PRROKII-p27-R        | GCCCTTGCTCACCATGGTACCAATATAATAATTTGAGACTCTT    |                                    |
| SICAT1-Mcs-dsRed-F     | CTCTCTACAAGATCTATGGATCCCTCTAAGTATCGCC          | subcellular localization           |
| SICAT1-Mcs-dsRed-R     | CAGAATTCGAAGCTTTCATTGTAGGCTTCACAGTGAGA         |                                    |
| SICAT2-Mcs-dsRed-F     | CTCTCTACAAGATCTATGGATCCTTACAAGTACCGTC          | subcellular localization           |
| SICAT2-Mcs-dsRed-R     | CAGAATTCGAAGCTTTTATGCTTGGTCTCACATTAAGC         |                                    |
| pGD-SICAT1-Flag-F      | CGAATTCTGCAGTCGACGATGGATCCCTCTAAGTATCGCC       | Co-IP                              |
| pGD-SICAT1-Flag-R      | TCTAGATCCGGTGGATCCTCACATTGTAGGCTTCACAGTGAG     | Co-IP                              |

|                   |                                             |                  |
|-------------------|---------------------------------------------|------------------|
| pGD-SICAT2-Flag-F | CGAATTCTGCAGTCGACGATGGATCCTTACAAGTACCGTC    | Co-IP            |
| pGD-SICAT2-Flag-R | TCTAGATCCGGTGGATCCTCATATGCTTGGTCTCACATTAAGC | Co-IP            |
| TRV-NbCAT1-F      | AAGGTTACCGAATTCTCTAGACGAGGAGATCGACTACTTCC   | VIGS             |
| TRV-NbCAT1-R      | CGTGAGCTCGGTACCGGATCCTTAAGCCTAGAAGCAAGCTT   |                  |
| TRV-NbCAT2-F      | AAGGTTACCGAATTCTCTAGATATCCCGAGTGGAAGTCT     | VIGS             |
| TRV-NbCAT2-R      | CGTGAGCTCGGTACCGGATCCAAGCTGCATATAGTTTGGTCC  |                  |
| NbCAT1-F          | ATGGATCCATACAAGTATCGTC                      | RT-PCR detection |
| NbCAT1-R          | TCATATGCTTGGTCTCACATTA                      |                  |
| NbCAT2-F          | TATCCCGAGTGGAAGTCT                          | RT-PCR detection |
| NbCAT2-R          | AAGCTGCATATAGTTTGGTCC                       |                  |
| ToCV p27-F        | ATGGAGGTCGTGTACAATTCAG                      | RT-PCR detection |
| ToCV p27-R        | TCAAATATAATAATTTGAGACT                      |                  |
| ToCV CP-F         | ATGGAGAACAGTGCTGTTGCAA                      | RT-PCR detection |
| ToCV CP-R         | TTAGCAACCAGTTATCGATGCA                      |                  |
| SICAT1-F          | ATGGATCCCTCTAAGTATCGCC                      | RT-PCR detection |
| SICAT1-R          | TCACATTGTAGGCTTCACAGTG                      |                  |
| 35S-F             | GACGCACAATCCCACTATCC                        | RT-PCR detection |
| NOS-R             | GATAATCATCGCAAGACCGG                        |                  |
| RT-qNbCAT1-F      | GTTCTACACCAGAGAGGGAAAC                      | qRT-PCR          |
| RT-qNbCAT1-R      | GACCATGTCAGGGAACTTCAT                       |                  |
| RT-qNbCAT2-F      | TTTGATCCTCTTGATGTAAC                        | qRT-PCR          |
| RT-qNbCAT2-R      | TCAGCATACGCAATATCC                          |                  |
| RT-qToCVCP-F      | CCGTTAGATGATGGCGTAGATG                      | qRT-PCR          |
| RT-qToCVCP-R      | GCCCAACTGGAAGATCGATTAG                      |                  |
| RT-qPVXCP-F       | CAGGGTCAACTACCTCAACTAC                      | qRT-PCR          |
| RT-qPVXCP-R       | GGCACGAGCTGTACTAAAGAA                       |                  |
| p27-QATG-F        | GAGGTCGTGTACAATTCAGACG                      | qRT-PCR          |
| p27-QTGA-R        | AATATAATAATTTGAGACTCTT                      |                  |
| RT-qPVX97-F       | CTGCTGCCTTTGTGAAGATTAC                      | qRT-PCR          |
| RT-qPVX97-R       | GTTGTTCCAGTGATACGACCT                       |                  |
| EF-1 $\alpha$ -F  | TGAGATGCACCACGAAGCTC                        | qRT-PCR          |
| EF-1 $\alpha$ -R  | CCAACATTGTCACCAGGAAGTG                      |                  |

---
